# Supplementary material
Source: publisher site journal article supplement (https://www.dovepress.com/article/596523)
Supplement: Supplementary file 1 [file 596523_Supplementary%20tables.docx]

Supplementary Table 1. Detection of CTCs corresponding to selected profiles.

| **General information** | **Preoperative CTCs** | **Postoperative CTCs** |
| --- | --- | --- |
| **Sex** (n[%]) |  |  |
| Male | 27 (96.4%) | 27 (96.4%) |
| Female | 31 (96.9%) | 32 (100.0%) |
| **Age** (n[%]) |  |  |
| ＞60y | 30 (96.8%) | 31 (100.0%) |
| ≤60y | 28 (96.6%) | 28 (96.6%) |
| **Tumour long diameter** (n[%]) |  |  |
| 10-20mm | 35 (97.2%) | 36 (100.0%) |
| ＞20cm | 23 (95.8%) | 23 (95.8%) |
| **Nature of the lesion**  (n[%]) |  |  |
| pGGO | 5 (83.3%) | 6 (100.0%) |
| mGGO | 35 (100.0%) | 35 (100.0%) |
| Solid tumour | 18 (94.7%) | 18 (94.7%) |
| **Pathological type (n[%])** |  |  |
| Adenocarcinoma | 51 (96.2%) | 53 (100.0%) |
| squamous cell carcinoma | 6 (100.0%) | 5 (83.3%) |
| Other | 1 (100.0%) | 1 (100.0%) |
| **Tumour position** (n[%]) |  |  |
| Upper lobe  (upper + middle lobe) | 39 (95.1%) | 40 (97.6%) |
| lower lobe | 19 (100.0%) | 19 (100.0%) |
| **Degree of differentiation**  (n[%]) |  |  |
| Low | 12 (92.3%) | 13 (100.0%) |
| Middle | 26 (100.0%) | 25 (96.2%) |
| High | 20 (95.2%) | 21 (100.0%) |
| **Clinical Stage**  (n[%]) |  |  |
| Ⅰ | 55 (96.5%) | 56 (98.2%) |
| Ⅱ | 3 (100.0%) | 3 (100.0%) |

Supplementary Table 2. Sensitivity analysis excluding wedge resection

| Analysis | n | Preoperative_total_CTC_median_IQR | Postoperative_total_CTC_median_IQR | Statistic_W | Z | P |
| --- | --- | --- | --- | --- | --- | --- |
| Overall | 54 | 11 (4.25, 17.50) | 11 (5.25, 22.75) | 442 | 2.074 | 0.038 |
| Lung-first group | 27 | 11 (5.50, 21) | 8 (3.50, 12) | 245.5 | -1.782 | 0.075 |
| Lymph-node-first group | 27 | 9 (4, 15.50) | 20 (9.50, 27.50) | 1 | 4.35 | <0.001 |

Supplementary Table 3. Correlation analysis between CTRs and CTCs in those with sub-solid lesions.

|  |  | Preoperative CTCs | Postoperative CTCs |
| --- | --- | --- | --- |
| CTR | *r* | 0.205 | 0.493 |
| *P* | 0.236 | 0.003 |

Supplementary Table 4. Changes in the number of each subtype of CTCs before and after surgery.

|  | Preoperative | Postoperative |
| --- | --- | --- |
| Aggregate | 835 | 909 |
| Epithelial type | 483 | 555 |
| Hybrid type | 340 | 350 |
| Mesenchymal type | 10 | 4 |
